# Supplementary material
Source: PubMed Central journal article supplement (PMC4112014)

**A**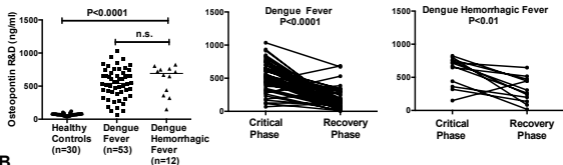**B**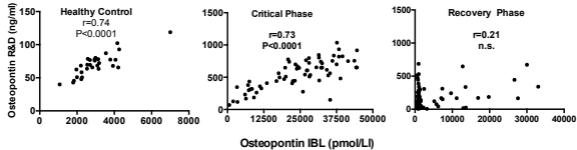**C**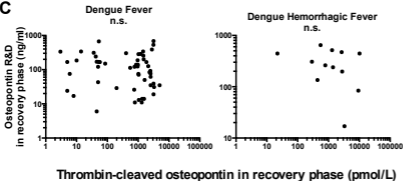

Supplement: NIHMS597716-supplement-01.pdf [file NIHMS597716-supplement-01.pdf]
